# Supplementary material
Source: MDPI journal article supplement (https://www.mdpi.com/2073-4395/8/6/94)
Supplement: s1 [file s1]

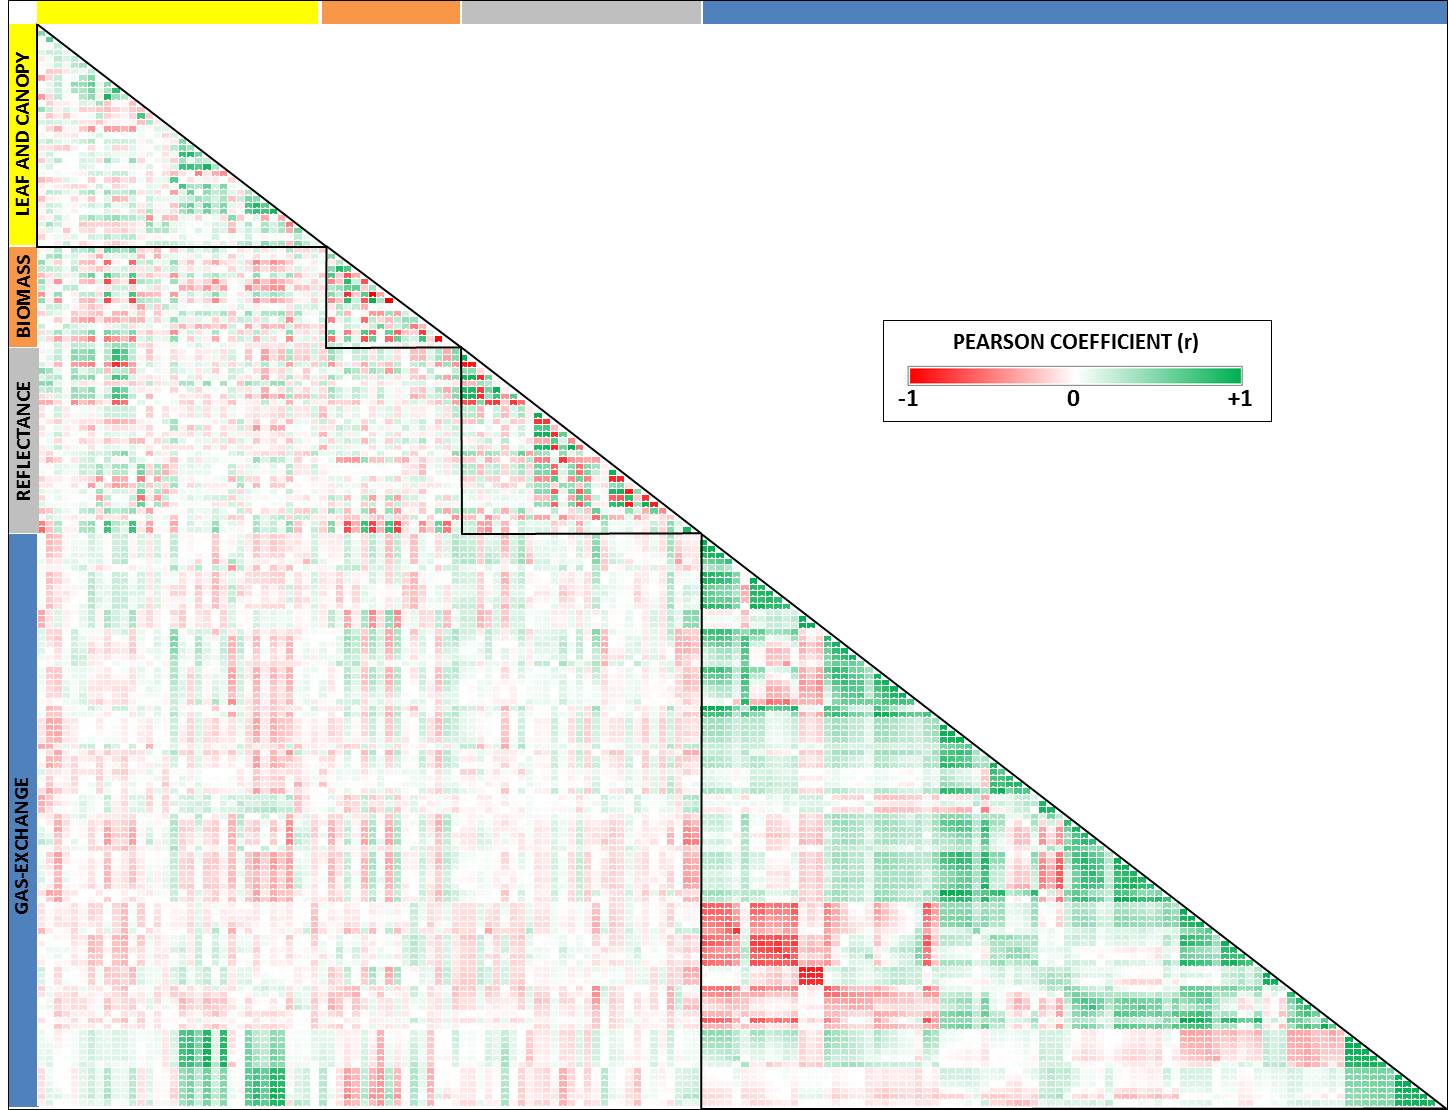


**Figure S1.** Matrix of Pearson correlation coefficients *(r)* for pairs of traits measured in a double-haploid wheat mapping population grown in UK (*n* = 120).

Coefficient values range from −1 (dark red, strong negative correlation) to +1 (dark green, strong positive correlation), through 0 (white, no correlation). Black bordered triangles limit the correlations within a specific group of traits related to Leaf and Canopy, Biomass, Reflectance indices, and Gas-exchange.
